# Supplementary material for: Effect of high-sensitivity C-reactive protein on the relationship between haemoglobin A1c and cardiovascular events in patients with acute coronary syndrome undergoing percutaneous coronary intervention: a cohort study
Source: PubMed Central journal article supplement — Cardiovasc Diagn Ther. 2022 Oct;12(5):614–25. doi: 10.21037/cdt-22-78 (PMC9622396; doi:10.21037/cdt-22-78), 2022-10
Supplement: cdt-12-05-614-dss.pdf [file cdt-12-05-614-dss.pdf]

## Data Sharing Statement

|                     |                                                                                                                                                    |                                                                                                   |
|---------------------|----------------------------------------------------------------------------------------------------------------------------------------------------|---------------------------------------------------------------------------------------------------|
| <b>Article Info</b> | <a href="https://dx.doi.org/10.21037/cdt-22-78">https://dx.doi.org/10.21037/cdt-22-78</a>                                                          |                                                                                                   |
| <b>Item</b>         | <b>Question</b>                                                                                                                                    | <b>Authors' Response<br/>(place "-" if not applicable)</b>                                        |
| 1                   | Would you like to share data collected for your study to others?                                                                                   | No                                                                                                |
| 2                   | If not, would you like to share the reason for your decision?                                                                                      | According to the Ethics Committee Approval statement, data used in this study will not be shared. |
| 3                   | What data in particular will be shared?                                                                                                            | None                                                                                              |
| 4                   | Any other documents will be share? Such as study protocol, statistical analysis plan, informed consent form, clinical study report, analytic code. | No                                                                                                |
| 5                   | When will data availability begin?                                                                                                                 | -                                                                                                 |
| 6                   | When will data availability end?                                                                                                                   | -                                                                                                 |
| 7                   | To whom will you share the data?                                                                                                                   | -                                                                                                 |
| 8                   | For what type of analysis or purpose?                                                                                                              | -                                                                                                 |
| 9                   | How or where can the data/documents be obtained?                                                                                                   | -                                                                                                 |
| 10                  | Any other restrictions?                                                                                                                            | -                                                                                                 |
