# Supplementary material for: Effect of high-sensitivity C-reactive protein on the relationship between haemoglobin A1c and cardiovascular events in patients with acute coronary syndrome undergoing percutaneous coronary intervention: a cohort study
Source: PubMed Central journal article supplement — Cardiovasc Diagn Ther. 2022 Oct;12(5):614–25. doi: 10.21037/cdt-22-78 (PMC9622396; doi:10.21037/cdt-22-78), 2022-10
Supplement: cdt-12-05-614-supplementary.pdf [file cdt-12-05-614-supplementary.pdf]

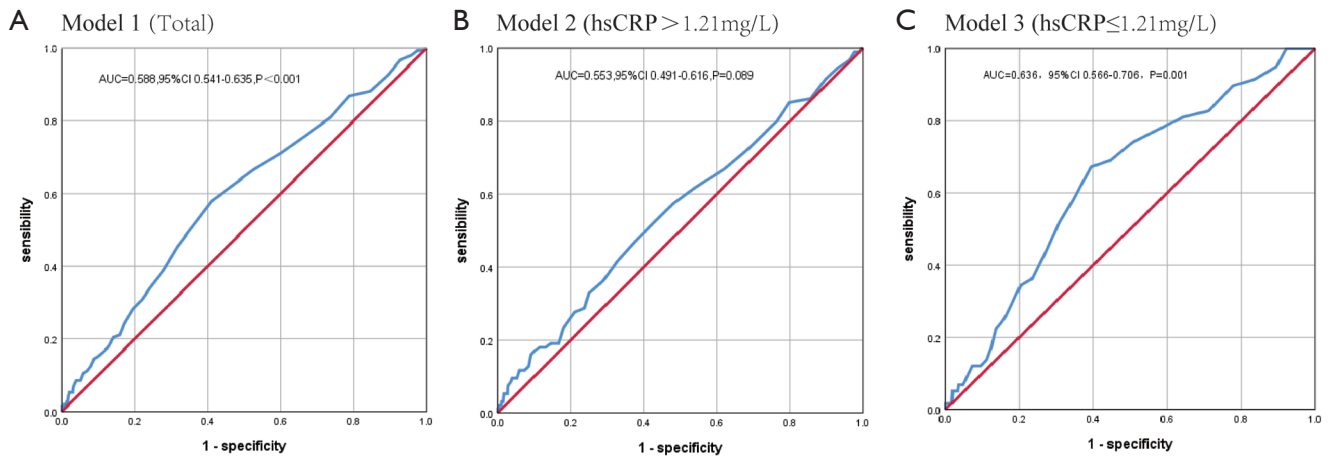

**Figure S1** ROC curve analysis of HbA1c to predict cardiovascular events in different hsCRP levels. Prediction models including HbA1c were more effective to predict cardiovascular events in patients hsCRP  $\leq 1.21$  mg/L (C) than in total population (A) and patients hsCRP  $> 1.21$  mg/L (B). AUC, area under the curve; CI, confidence interval; HbA1c, hemoglobin A1c; hsCRP, high-sensitivity C-reactive protein; ROC, receiver operating characteristic.
